# Supplementary material for: Stimulating changes in the elastic modulus of polymer materials by molecular photochromism
Source: Royal Society of Chemistry journal article supplement (doi:10.1039/c4ra12310g), 2014-01-01
Supplement: c4ra12310g1.pdf [file c4ra12310g1.pdf]

### Supporting Information

#### **Stimulating changes in the elastic modulus of polymer materials by molecular photochromism**

**Yuhuan Jin,<sup>a,‡</sup> Daniel Harrington,<sup>b</sup> Aaron A. Rachford<sup>c</sup> and Jeffrey J. Rack<sup>\*a</sup>**

<sup>a</sup> *Department of Chemistry and Biochemistry, Nanoscale and Quantum Phenomena Institute, Clippinger Laboratories, Ohio University, Athens, OH 45701, USA Fax: 01 740 593 0148; Tel: 01 740 593 9702; E-mail: rackj@ohio.edu*

<sup>b</sup> *The Dow Chemical Company, Organics Polymers and Organometallics, 1776 Building, Midland, Michigan 48667, USA Fax: 01 989 638 6225; Tel: 01 989 638 6648; E-mail: drharrington@dow.com*

<sup>c</sup> *The Dow Chemical Company, Analytical Sciences, 1897 Building, Midland, Michigan 48667, USA Fax: 01 989 638 6432; Tel: 01 989 638 3774; E-mail: RAAaron@dow.com*

### Sample Preparation

The Ru-NB/NB copolymer was dissolved in cyclohexanone to obtain a solution concentration of 5% by weight. The solution was filtered by 0.2  $\mu\text{m}$  size nylon syringe filter, followed by concentrated to approximately 20% by weight under vacuum line. A 0.5 mL of the solution was dropped onto a cover glass, which was cleaned by piranha solution, and rotated with a low speed at 800 rpm for 12 seconds and 1500 rpm for 60 seconds by a spincoater KW-4A from Chemat Technology. The obtained film was further rotated at 3000 rpm for 60 seconds, followed with annealing at 65  $^{\circ}\text{C}$  in the oven overnight, to get rid of any remaining solvent.

### AFM Measurement

The AFM employed for all the measurements is MFP-3D-SA from Asylum Research. The probes used for normal surface topology scanning are Olympus AC160TS from Asylum Research, with a nominal spring constant of  $k=42\text{ N/m}$  and frequency of 300Hz. The probes utilized for nanoindentation were Diamond like carbon coated TESP from Bruker, with a nominal spring constant of  $k=42\text{ N/m}$  and nominal pyramid tip shape and tip radius of  $\sim 15\text{nm}$ . The probes were used as received without any further treatment. The surface topology scanning was performed under tapping mode and nanoindentation is performed under contact mode in the air.

### GPC of Polymers

Samples were prepared by dissolving  $\sim 20\text{ mg}$  of polymer to 10 mL dichloromethane in glass vials, for a final concentration of  $\sim 2\text{ mg/mL}$ . Vials were capped and swirled for approximately 5 minutes until thoroughly dissolved. Solutions were then filtered through a  $0.45\mu\text{m}$  PTFE syringe filter (Whatman) directly into two pre-labeled 2mL screw-cap GC vials (Agilent) and capped. Vials containing non-irradiated authentic solutions were set aside while the second set of vials were individually irradiated using a blue laser pointer (UV, 405 nm,  $<5\text{ mW}$  intensity) for 5 minutes. All samples (irradiated and non-irradiated) were then loaded onto an Agilent 1100 GPC autosampler deck and GPC was performed using the conditions outlined below.

#### GPC Conditions

Eluent: THF+ 2 ppt  $\text{LiNO}_3$   
Columns: (2) PL  $5\mu\text{m}$  Mixed D (7.5x300mm)  
Temp: 35 $^{\circ}\text{C}$  Injection Vol: 50 $\mu\text{L}$   
Flow Rate: 1.00mL/min  
Sample Concentration:  $\sim 2\text{ mg/mL}$   
Detector: Viscotek dRI (35 $^{\circ}\text{C}$ )

Calibration: Conventional GPC, standard column calibration using narrow Polystyrene (PS) standards from Agilent (EasiCAL2). All values reported as Polystyrene equivalent molecular weights.

### Modeling/Analysis of Nanoindentation Data (Oliver-Pharr Model)

Penetrating the surface with an indenter tip with a loading force  $F_{max}$  on the tip, results in a penetration depth of  $h_{max}$ . When the tip reaches the maximum depth, the sample surface conformed to the tip shape at depth  $h_c$ , and this depth to the initial surface is  $h_s$ . During the

unloading process, the tip has direct contact with the surface through  $h_t$ , and left unrecoverable depth  $h_f$ . The  $h_s$  could be given by:

$$h_s = \varepsilon \frac{F_{\max}}{S_{\max}} \quad \text{Equation (1)}$$

where  $\varepsilon$  is a constant and  $S$  is elastic unloading stiffness. The  $\varepsilon$  depends on the geometry of the indenter, and a value of 0.75 was recommended for the pyramid indenter based on empirical observation.  $S$  is given by:

$$S = \frac{d_F}{d_h} \quad \text{Equation (2)}$$

The unloading curve follows a power law, which is described by:

$$F = BE^*(h - h_f)^m \quad \text{Equation (3)}$$

Where  $B$  and  $m$  are constants,  $BE^*$  and  $m$  could be deduced from the fitting of force vs displacement curve. The power constant  $m$  is related to the efficient indenter shape. For an ideal pyramid tip, the value of  $m$  is 1.5. But normally the actual value of  $m$  varies from 1.2~1.8. After the identification of Equation 3,  $S_{\max}$  could be calculated by Equation 2.

The contact depth of the tip and the sample at maximum penetration depth is:

$$h_c = h_{\max} - h_s \quad \text{Equation (4)}$$

By introducing Equation 1 into Equation 4, it turns into:

$$h_c = h_{\max} - \varepsilon \frac{F_{\max}}{S_{\max}} \quad \text{Equation (5)}$$

The cross sectional area of the indenter and the surface is a function of the contact depth. For a pyramid indenter, the area function is:

$$A = 3\sqrt{3} \tan^2 \theta \cdot h_c^2 \quad \text{Equation (6)}$$

Once the contact area is determined, the hardness  $H$  and effective Young's modulus  $E^*$  is estimated by Equation 7 and Equation 8:

$$H = \frac{F_{\max}}{A} \quad \text{Equation (7)}$$

$$E^* = \frac{1}{2\beta} \sqrt{\frac{\pi}{A}} \cdot S_{\max} \quad \text{Equation (8)}$$

where  $\beta$  is taken as a dimensionless unity. The effective Young's modulus is a combination of the sample modulus and the tip modulus, it is defined by Equation 9:

$$\frac{1}{E^*} = \frac{1 - \nu_{\text{sample}}^2}{E_{\text{sample}}} + \frac{1 - \nu_{\text{tip}}^2}{E_{\text{tip}}} \quad \text{Equation (9)}$$

where  $\nu$  is the Poisson ratio. The Poisson ratio could be measured for bulk materials, but it is relatively difficult in nanoscale. However, the Young's modulus of the tip is much larger than the sample.  $E_{\text{tip}}$  can be neglected, as it would just result in an error of less than 1%. In this work, the

effective Young's modulus is used instead of the sample Young's modulus for abbreviation.

**Table S1.** The nanoindentation fitting result for poly-NB polymer film

| No. | $E_c$ (MPa) | Stiffness (N/m) | Hardness (MPa) | Adhesion force(nN) | M   |
|-----|-------------|-----------------|----------------|--------------------|-----|
| 1   | 129         | 48              | 81             | 70                 | 2.3 |
| 2   | 126         | 45              | 95             | 105                | 2.8 |
| 3   | 150         | 59              | 79             | 98                 | 2.8 |
| 4   | 145         | 55              | 88             | 91                 | 2.4 |
| 5   | 157         | 64              | 74             | 108                | 2.4 |
| 6   | 132         | 49              | 92             | 104                | 2.3 |
| 7   | 145         | 58              | 77             | 119                | 2.2 |
| 8   | 142         | 58              | 71             | 41                 | 1.9 |
| 9   | 126         | 44              | 100            | 97                 | 2.2 |
| 10  | 122         | 39              | 123            | 63                 | 2.2 |
| 11  | 116         | 41              | 98             | 57                 | 2.1 |
| 12  | 135         | 45              | 110            | 57                 | 2.1 |
| 13  | 150         | 57              | 87             | 76                 | 1.8 |
| 14  | 137         | 49              | 96             | 70                 | 2.1 |

No.1-7 are results before irradiated by 405nm laser light, No.8-14 are results after irradiated with 405nm laser light.

**Table S2.** The nanoindentation fitting result for poly-[Ru(bpy)<sub>2</sub>pySO-NB/NB]<sup>0+</sup> 1:25 copolymer film

| No | $E_c$ (MPa) | Stiffness(N/m) | Hardness (MPa) | Adhesion Force(nN) | M   |
|----|-------------|----------------|----------------|--------------------|-----|
| 1  | 700         | 78             | 1059           | 287                | 1.4 |
| 2  | 684         | 80             | 951            | 260                | 1.4 |
| 3  | 679         | 80             | 941            | 259                | 1.5 |
| 4  | 681         | 80             | 937            | 220                | 1.5 |
| 5  | 678         | 78             | 984            | 273                | 1.4 |
| 6  | 682         | 77             | 1028           | 239                | 1.4 |
| 7  | 666         | 75             | 1014           | 261                | 1.4 |
| 8  | 665         | 77             | 969            | 255                | 1.4 |
| 9  | 671         | 77             | 996            | 271                | 1.4 |
| 10 | 667         | 78             | 952            | 256                | 1.4 |
| 11 | 681         | 81             | 934            | 288                | 1.4 |
| 12 | 692         | 83             | 916            | 258                | 1.4 |
| 13 | 716         | 82             | 991            | 252                | 1.4 |
| 14 | 711         | 81             | 1005           | 290                | 1.4 |

|    |     |    |      |     |     |
|----|-----|----|------|-----|-----|
| 15 | 703 | 81 | 980  | 311 | 1.4 |
| 16 | 679 | 80 | 936  | 271 | 1.4 |
| 17 | 717 | 81 | 1024 | 313 | 1.4 |
| 18 | 705 | 82 | 968  | 311 | 1.4 |
| 19 | 712 | 80 | 1037 | 305 | 1.4 |
| 20 | 730 | 80 | 1085 | 254 | 1.4 |

No.1-10 are samples before irradiated by 405nm laser light, No.11-20 are samples after irradiated with 405nm laser light.

**Table S3.** The nanoindentation fitting result for poly-[Ru(bpy)<sub>2</sub>pySO-NB/NB]<sup>nt+</sup> 1:40 copolymer film

| No | E <sub>c</sub> (MPa) | Stiffness(N/m) | Hardness (MPa) | Adhesion Force(nN) | M   |
|----|----------------------|----------------|----------------|--------------------|-----|
| 1  | 490                  | 78             | 508            | 436                | 1.3 |
| 2  | 497                  | 83             | 469            | 352                | 1.4 |
| 3  | 528                  | 85             | 503            | 379                | 1.6 |
| 4  | 534                  | 88             | 485            | 318                | 1.5 |
| 5  | 489                  | 82             | 458            | 333                | 1.5 |
| 6  | 497                  | 79             | 517            | 348                | 1.5 |
| 7  | 517                  | 85             | 488            | 360                | 1.5 |
| 8  | 504                  | 87             | 438            | 343                | 1.6 |
| 9  | 485                  | 84             | 438            | 362                | 1.5 |
| 10 | 478                  | 80             | 471            | 309                | 1.4 |
| 11 | 508                  | 84             | 469            | 339                | 1.4 |

**Table S3.** Continued.

| No | E <sub>c</sub> (MPa) | Stiffness(N/m) | Hardness (MPa) | Adhesion Force(nN) | M   |
|----|----------------------|----------------|----------------|--------------------|-----|
| 12 | 503                  | 84             | 476            | 392                | 1.6 |
| 13 | 703                  | 108            | 535            | 415                | 2.2 |
| 14 | 722                  | 104            | 636            | 319                | 1.7 |
| 15 | 730                  | 107            | 610            | 300                | 1.9 |
| 16 | 709                  | 102            | 634            | 286                | 1.6 |
| 17 | 697                  | 110            | 524            | 275                | 1.8 |
| 18 | 681                  | 100            | 609            | 261                | 1.6 |
| 19 | 704                  | 103            | 611            | 319                | 1.6 |
| 20 | 730                  | 105            | 645            | 307                | 1.7 |
| 21 | 738                  | 99             | 729            | 366                | 1.5 |
| 22 | 737                  | 106            | 627            | 296                | 2.3 |
| 23 | 686                  | 102            | 602            | 356                | 1.6 |
| 24 | 725                  | 106            | 608            | 330                | 1.6 |

No.1-12 are results before irradiated by 405nm laser light, No.13-24 are results after irradiated

with 405nm laser light.

**Table S4.** The nanoindentation fitting result for poly-RupySO-NB/NB 1:150 copolymer film

| No | E <sub>c</sub> (MPa) | Stiffness(N/m) | Hardness (MPa) | Adhesion Force(nN) | M   |
|----|----------------------|----------------|----------------|--------------------|-----|
| 1  | 265                  | 82             | 131            | 159                | 2.2 |
| 2  | 242                  | 73             | 134            | 133                | 2.2 |
| 3  | 236                  | 72             | 132            | 175                | 2.2 |
| 4  | 240                  | 75             | 126            | 164                | 2.6 |
| 5  | 237                  | 69             | 146            | 158                | 1.9 |
| 6  | 227                  | 66             | 146            | 180                | 1.9 |
| 7  | 241                  | 75             | 125            | 166                | 2.3 |
| 8  | 229                  | 70             | 131            | 191                | 2.1 |
| 9  | 271                  | 80             | 136            | 149                | 2.1 |
| 10 | 250                  | 76             | 136            | 166                | 2.5 |
| 11 | 252                  | 77             | 132            | 146                | 2.7 |
| 12 | 240                  | 73             | 133            | 163                | 2.4 |
| 13 | 236                  | 71             | 137            | 147                | 2.2 |
| 14 | 248                  | 77             | 130            | 130                | 2.6 |
| 15 | 233                  | 69             | 140            | 137                | 2.1 |
| 16 | 227                  | 68             | 139            | 141                | 2.1 |

No.1-8 are results before irradiated by 405nm laser light, No.9-16 are results after irradiated with 405nm laser light.

**Table S5.** The nanoindentation fitting result for poly-RupyS-NB/NB 1:40 copolymer film

| No | E <sub>c</sub> (MPa) | Stiffness(N/m) | Hardness (MPa) | Adhesion Force(nN) | M   |
|----|----------------------|----------------|----------------|--------------------|-----|
| 1  | 335                  | 55             | 495            | 673                | 1.2 |
| 2  | 341                  | 57             | 457            | 689                | 1.2 |
| 3  | 343                  | 60             | 421            | 675                | 1.2 |
| 4  | 320                  | 54             | 452            | 711                | 1.1 |
| 5  | 336                  | 58             | 442            | 649                | 1.2 |
| 6  | 334                  | 55             | 470            | 641                | 1.1 |
| 7  | 326                  | 56             | 443            | 652                | 1.2 |
| 8  | 338                  | 58             | 441            | 617                | 1.3 |
| 9  | 352                  | 55             | 531            | 680                | 1.2 |
| 10 | 333                  | 57             | 443            | 702                | 1.2 |
| 11 | 314                  | 47             | 581            | 868                | 1.1 |
| 12 | 307                  | 48             | 535            | 779                | 1.3 |
| 13 | 308                  | 45             | 588            | 617                | 1.2 |
| 14 | 332                  | 60             | 383            | 721                | 1.5 |
| 15 | 329                  | 62             | 352            | 823                | 1.4 |

|    |     |    |     |     |     |
|----|-----|----|-----|-----|-----|
| 16 | 321 | 48 | 571 | 825 | 1.1 |
| 17 | 319 | 56 | 402 | 640 | 1.3 |
| 18 | 324 | 48 | 593 | 817 | 1.1 |
| 19 | 322 | 55 | 439 | 733 | 1.4 |
| 20 | 305 | 45 | 580 | 787 | 1.0 |

No.1-10 are results before irradiated by 405nm laser light, No.11-20 are results after irradiated by 405nm laser light.

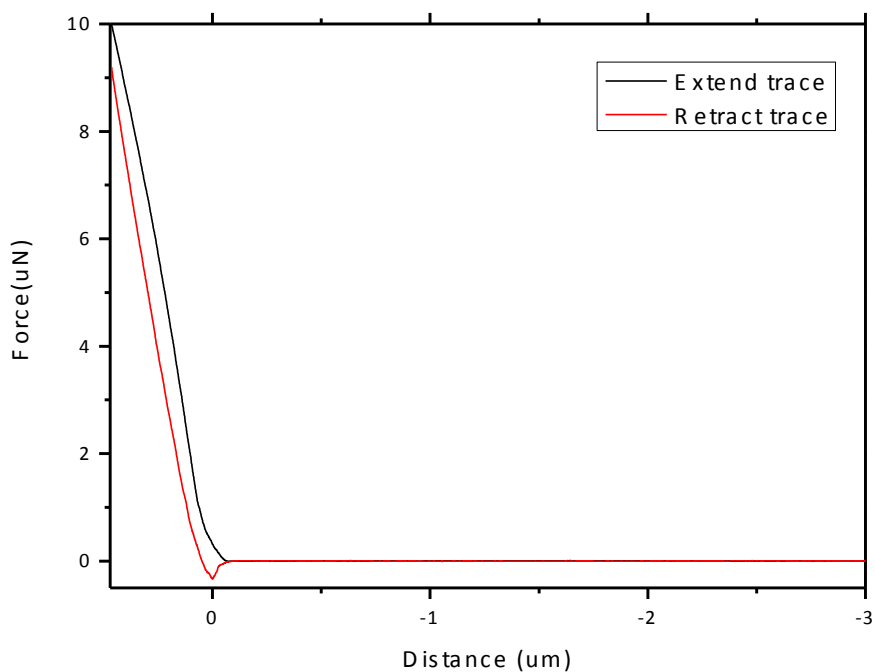

**Figure S1.** A typical force curve for poly-[Ru(bpy)<sub>2</sub>pySO-NB/NB]<sup>n+</sup> 1:40 copolymer film. The black line represents the extend trace, where the probe is moving towards the surface; the red line represents the retract trace, where the probe is moving away the surface.

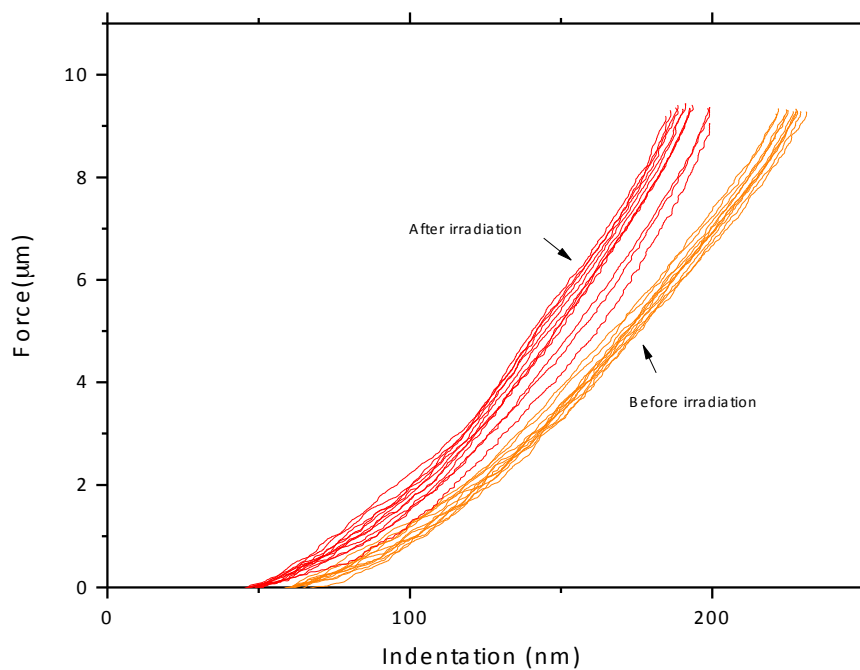

**Figure S2.** Force vs Indentation curve for poly-[Ru(bpy)<sub>2</sub>pySO-NB/NB]<sup>n+</sup> 1:40 polymer film before and after irradiation with 405nm laser light. The solid red lines are the curves before irradiation, and the orange lines are the curves after irradiation.
